1 **Title**

- 2 • ***In vivo* macromolecular crowding is differentially modulated by Aquaporin 0 in**  
3 **zebrafish lens: insights from a nano-environment sensor and spectral imaging.**

4  
5 **Short Title**

- 6 • **In vivo zebrafish lens macromolecular crowding insights.**

7  
8 **Authors**

9 Irene Vorontsova<sup>1,2,3,¶</sup>, Alexander Vallmitjana<sup>4,¶</sup>, Belén Torrado<sup>4</sup>, Thomas Schilling<sup>2</sup>,  
10 James E. Hall<sup>1</sup>, Enrico Gratton<sup>4</sup>, Leonel Malacrida<sup>5,6,\*</sup>.

11  
12 **Affiliations**

13 <sup>1</sup>Physiology and Biophysics, University of California, Irvine, Irvine, CA, USA,

14 <sup>2</sup>Developmental and Cell Biology, University of California, Irvine, Irvine, CA, USA,

15 <sup>3</sup>Neurobiology and Behavior, University of California, Irvine, Irvine, CA, USA,

16 <sup>4</sup>Biomedical Engineering, University of California, Irvine, Irvine, CA, USA,

17 <sup>5</sup>Departamento de Fisiopatología, Hospital de Clínicas, Facultad de Medicina, Universidad  
18 de la República, Montevideo, Uruguay.

19 <sup>6</sup>Advanced Bioimaging Unit, Institut Pasteur of Montevideo and Universidad de la  
20 República, Montevideo, Uruguay.

21 ¶These authors contributed equally to this work

22 \*Corresponding author: Leonel Malacrida

23 Email: [lmalacrida@hc.edu.uy](mailto:lmalacrida@hc.edu.uy)/[lmalacrida@pasteur.edu.uy](mailto:lmalacrida@pasteur.edu.uy)

25 **Abstract**

26 Macromolecular crowding is crucial for cellular homeostasis. *In vivo* studies of  
27 macromolecular crowding and ultimately water-dynamics are needed to understand their  
28 role in cellular fates. The macromolecular crowding in the lens is essential for  
29 understanding normal optics of the lens, and moreover for understanding and prevention  
30 of cataract and presbyopia. Here we combine the use of the water nano-environmentally  
31 sensitive sensor (6-acetyl-2-dimethylaminonaphthalene, ACDAN) with *in vivo* studies of  
32 Aquaporin zero zebrafish mutants to understand the lens macromolecular crowding.  
33 Spectral phasor analysis of ACDAN fluorescence reveal the extent of water dipolar  
34 relaxation and demonstrate that the mutations in the duplicated zebrafish Aquaporin 0s,  
35 Aqp0a and Aqp0b, alter the water state and macromolecular crowding in the living  
36 zebrafish lens. Our results provide *in vivo* evidence that Aqp0a promotes fluid influx in  
37 the deeper lens cortex, whereas Aqp0b facilitates fluid efflux. This work opens new  
38 perspectives for *in vivo* studies on macromolecular crowding.

39  
40 **Teaser**

41 In this study we uncover the roles of Aquaporin 0 in macromolecular crowding required  
42 for lens development and vision.  
43

## 44 Introduction

45 Solutes occupy 35-95% of eukaryotic cell volume, with the rest being water. The ratio and  
46 interaction between water and solutes determine cellular macromolecular crowding, a key  
47 feature of cellular organization and function (1–3). However, its physiological roles  
48 remain obscure and are challenging to study in living organisms. There has been a great  
49 effort to understand the roles of macromolecular crowding in enzymatic activity, cell  
50 physiology, and pathophysiology, primarily using *in vitro* and cell culture systems (1, 3–  
51 5). However, efforts to study macromolecular crowding *in vivo* with non-invasive, high-  
52 resolution spectroscopic tools remain challenging. In this study, we were able to overcome  
53 the technical difficulties to study the *in vivo* development of macromolecular crowding in  
54 the lens, as well as to test the contribution of the zebrafish Aquaporin 0 orthologues to  
55 macromolecular crowding by using a nano-environmental sensor (ACDAN, 6-acetyl-2-  
56 dimethylaminonaphthalene) paired with hyperspectral imaging and spectral phasor  
57 analysis.

58 The ocular lens relies on high macromolecular crowding to determine its structure and  
59 function (6). To achieve and maintain the required refractive index gradient the lens fiber  
60 cells are enriched with crystallin proteins (4), moreover, lens water is tightly regulated to  
61 maintain lens homeostasis and proper optics. Regulation of water transport/activity is  
62 finely tuned in different parts of the lens, adjusting macromolecular crowding to optimize  
63 the refractive index gradient (7). Water influx/efflux is required to facilitate the  
64 microcirculation of ions by inward fluid flow at the lens poles and efflux of nutrients and  
65 waste at the equator (8). In addition, the direction of fluid and ion transport reverse with  
66 depth into the lens due to changes in electrochemical gradients (9). Net fluid influx in the  
67 inner lens cortex must equal net fluid efflux in the outer cortex to maintain homeostasis  
68 (10). The mechanisms by which water transport regulates macromolecular crowding in the  
69 lens *in vivo* remain unclear; nonetheless, Aquaporin 0 (AQP0, also known as Membrane  
70 Intrinsic Protein, MIP), and in mammals Aquaporin 5, were proposed as water transport  
71 regulators (11, 12). AQP0 is the most abundant membrane protein in the lens and is  
72 required for lens homeostasis (6). AQP0 permeates water *in vitro* (13) and functions as an  
73 adhesive protein (14, 15), cytoskeletal anchor (16, 17), and regulator of gap junctions in  
74 lens fiber cells (18, 19). In mammals, a single AQP0 protein performs all of these  
75 functions. In contrast, zebrafish (*Danio rerio*), as a consequence of an ancient teleost-  
76 lineage genome duplication, have two AQP0 orthologues (20), Aqp0a and Aqp0b,  
77 allowing genetic dissection of at least some of these functions (21–23). Aqp0a and Aqp0b

78 are both essential for lens transparency at 3 days post fertilization (dpf) (21–23). While the  
79 loss of Aqp0b alone causes no apparent lens defects, loss of Aqp0a disrupts the anterior  
80 lens suture, leading to anterior polar opacity at adult stages (21, 24). Both Aqp0a and  
81 Aqp0b expressed in *Xenopus laevis* oocytes, permeate water *in vitro* (22, 25). However,  
82 only Aqp0a knock-down zebrafish required introduction of Aqp0 with intact water  
83 transport function to rescue embryonic cataract (23), possibly by recovering  
84 macromolecular crowding homeostasis.

85 Measuring water homeostasis in living lenses in the presence or absence of Aqp0 function  
86 in specific lens regions is challenging due to the dearth of non-invasive tools. Our  
87 approach to investigating water homeostasis *in vivo* employs a solvatochromic molecule  
88 (ACDAN), and hyperspectral imaging to provide information on spectroscopic  
89 macromolecular crowding at the nano-environment sensor. ACDAN is a non-toxic  
90 membrane permeable fluorescent probe, which reports on water dipolar relaxation (DR)  
91 within a few Angstroms of its location (26, 27). This probe has been used as a sensor for  
92 water dynamics in living cells (28, 29). Water dipolar relaxation (DR) is responsive to  
93 macromolecular crowding due to its extreme sensitivity to the number of water molecules  
94 and the dipolar relaxation time in its nano-environment (see schematic at Figure 1A). In  
95 this study, we define a dipolar relaxation index using hyperspectral microscopy and  
96 spectral phasor analysis. Changes in ACDAN DR index are indicative of macromolecular  
97 crowding variation. This index was built using spectral phasor plot analysis (30, 31). The  
98 spectral phasor transforms spectra pixel-by-pixel into a 2D scatter plot, where the axes are  
99 the real and imaginary components of the Fourier transform. This transformation captures  
100 the morphology of the emission spectra and maps it onto the phasor 2D space where, in  
101 polar coordinates, the angle carries the information regarding the spectral center of mass,  
102 and the radial direction carries information on the spectral broadening. The spectral phasor  
103 properties are crucial for the pixel-by-pixel model-less analysis of the spectral information  
104 (32), as described in the methods section.

105 To tackle the spatial/temporal DR information in the lens, we developed a combination of  
106 hyperspectral imaging and image processing tools for 3D (x/y/ $\lambda$ ) to 5D (x/y/z/ $\lambda$ /t) analysis  
107 to non-invasively study the development of lens macromolecular crowding and its  
108 perturbation in zebrafish Aqp0 mutant lenses. In this work, ACDAN's DR index was first  
109 shown to be sensitive to crystallin crowding *in vitro* and macromolecular crowding in  
110 living zebrafish lenses, validating its utility for measuring water dynamics *in vivo*.

111 ACDAN imaging in embryonic and larval lenses reveals a differential increase in  
112 macromolecular crowding throughout development, in a spatial and temporal concert. The  
113 macromolecular crowding revealed by ACDAN within the lens was higher than it could  
114 achieve in *in vitro* crystallin samples. We show that Aqp0a is required for the normal  
115 development of macromolecular crowding in the lens cortex, particularly at the posterior  
116 pole. Putting these data in light with previous work, we show that Aqp0a facilitates water  
117 influx in the inner cortex and efflux in the outer lens cortex. While the function of Aqp0b  
118 is non-essential, in combination with the loss of Aqp0a, it results in extensive cell swelling  
119 in the cortex, suggesting Aqp0b's role is water efflux in the outer cortex. We have thus  
120 dissected the specific roles for Aqp0a and Aqp0b in establishing and maintaining regional  
121 lens macromolecular crowding.

## 122 123 **Results**

### 124 **Spectral imaging of ACDAN reveals macromolecular crowding in vitro**

125 ACDAN spectral imaging provides a read-out of environment DR within a few angstroms  
126 of its macromolecular environment (Figure 1A). A solution of ACDAN in water has a  
127 peak fluorescence emission in the green region of the spectrum, around 520nm, which  
128 shifts towards blue (shorter wavelengths) with an increasing protein-to-water ratio (Figure  
129 1B). In the excited-state, ACDAN has a higher dipole moment than the ground state, and  
130 movement of nearby dipole-active molecules, such as water, lead to dipole relaxation  
131 (DR) (33), observed as a shift towards longer wavelengths (red-shift) in the maximum of  
132 the fluorescence emission. To measure these wavelength shifts in the emission, we used  
133 hyperspectral imaging, collecting the entire ACDAN spectrum and then transform to  
134 phasor space to map the pixels onto the spectral phasor plot (Figure 1B) (32). The phasor  
135 transform's power relies on its fit-free approach, meaning *a priori* knowledge of the  
136 spectral emission characteristics is not required.

137 To test spectral emission responses of ACDAN to increasingly crowded environments  
138 related to the intracellular lens environment, we imaged a range of Antarctic tooth fish  
139  $\gamma$ M8d crystallin concentrations in solution. Consistent with ACDAN serving as an  
140 accurate quantitative read-out of the water activity (confinement), and therefore protein-  
141 water ratio, we observed a blue spectral emission shift (DR decrease) as crystallin  
142 concentration increased (Figure 1B), confirming its sensitivity to macromolecular  
143 crowding in a lipid-free environment. Figure 1C shows the delta phase due to the decrease

144 in DR when the concentration of  $\gamma$ M8d crystallin increases from 0 to 340 mg/ml, which is  
145 close to maximum crystallin solubility. Note, that ACDAN short shifts in the delta phase  
146 represent significant increases in the molecular crowding.

### 147 148 **Macromolecular crowding increases during lens development**

149 We developed an automated image processing pipeline to analyze the hyperspectral stack  
150 in the zebrafish lens (Figure 2A). The details of this experimental pipeline can be found in  
151 supplementary Figure 3. Spatial DR is crucial for understanding water dynamics in the  
152 lens, so the ACDAN spectra were transformed pixel-by-pixel into the spectral phasor plot  
153 (Figure 2B), and then following the reciprocity principle, the DR value for each pixel  
154 (color scale) was applied back to its original x-y location (Figure 2C). To further analyze  
155 regional lens DR, images were segmented into different lens regions, measuring the  
156 distribution of DR across the radial geometry of the lens (Figure 2D, Supplementary  
157 Figure 2), and z-stacks were carried out. This analysis is fundamental to further  
158 understand the spatial-temporal information during the lens development and growth, for  
159 instance, 3D geometry (Supplementary Figure 4) and the axial DR (Figure 7) (cover in the  
160 following sections).

161 Crystallins are by far the most abundant cytoplasmic lens proteins. They become more  
162 concentrated toward the lens center, generating the gradient of refractive index required  
163 for emmetropia. We visualized the DR during the formation of this gradient in the  
164 zebrafish lens *in vivo* using ACDAN. The ACDAN signal was analyzed in embryonic and  
165 larval lenses in the equatorial plane. Since fish grow at different rates depending on their  
166 environment, lens diameters as well as age were used as measures of development during  
167 analysis (Supplementary Figure 5A) as we previously used (34).

168 ACDAN intensity images do not provide information regarding water dynamics; however,  
169 when transformed to DR images the spatial information across the lenses is valuable  
170 (Supplementary Figure 6). One may notice that the phasor cloud obtained for the different  
171 stages (Supplementary Figure 6 B1-6) are blue-shifted (lower phase) with respect to the  
172 higher crystallin concentration (340 mg/ml) obtained *in vitro* (Figure 1B and D). This  
173 result indicates that higher macromolecular crowding is experienced by ACDAN within  
174 lens cells.

175 In the immature lens at 2 days post fertilization (dpf) a high DR signal was found at the  
176 lens core, as well as in cell nuclei in the lens cortex and nucleus (Figure 3A1). Higher DR  
177 in the cell nuclei compared to the cytoplasm has been previously observed in cell culture  
178 (data not shown) and indicates lower nuclear macromolecular crowding. Although by 3  
179 dpf cell nuclei and organelles in fiber cells of the lens nucleus are degraded as part of the  
180 maturation of the lens (24, 35), the highest DR signal, which was in the cytoplasm of fiber  
181 cells, was still in the center of the lens, compared to lower DR at the lens periphery  
182 (Figure 3A2). As the lens matured, the lens nucleus gradually decreased in DR, and the  
183 maximum DR signal moved to the lens cortex, indicating an increased macromolecular  
184 crowding in the lens nucleus (Figure 3A3-6). The smooth mean radial profile confirmed  
185 the shift of the mean DR signal from the lens nucleus ( $r/a = 0$ ) in young lenses to the  
186 cortex in older/larger lenses (Figure 3B). The maximum DR signal stabilized at a relative  
187 distance from the lens center of  $r/a \sim 0.7$  from around 5 dpf and older (Figure 3C). A  
188 sigmoid curve was used to model the transition between the two states and the fit to this  
189 curve was very high ( $R^2=0.94$ ). Regionally segmented DR showed a decrease in DR signal  
190 in the inner cortex (Figure 3D4) and more so in the lens nucleus with development (Figure  
191 3D5).

192 Regions 5-10  $\mu\text{m}$ , and 75-85  $\mu\text{m}$  from the anterior pole (see Supplementary Table 1) were  
193 imaged to determine changes in DR as anterior and posterior sutures formed (Figure 4),  
194 respectively. DR decreased slightly in anterior sutures with lens development (Figure  
195 4B4), while the lens epithelium (Figure 4B2) and cortex (Figure 4B3) DR were  
196 unchanged. The mean DR in anterior planes overall appears similar at all stages, while the  
197 max DR slightly shifts away from the deeper cortex with development (Supplementary  
198 Figure 7A-B). DR at posterior poles initially increased from 2 to 4 dpf, and then decreased  
199 in older lenses (Figure 4C-D). This trend was particularly apparent in the posterior suture  
200 (Figure 4D3). These trends are verified by a mean DR smoothed surface plot and  
201 maximum DR plot (Supplementary Figure 7C-D). Posterior regions had higher DR  
202 compared to the anterior regions (Supplementary Figure 8 A, E, I).

203 Imaging z-stacks of several lenses further confirmed these DR patterns. Examples of 2-4  
204 dpf lens z-stacks in equatorial and axial orientations are provided as Supplementary  
205 animations 1-6. To confirm the DR patterns observed in mature lenses were not artifacts  
206 of the optical setup (e.g. low in the center, high at periphery), a spherically and conically  
207 slicing of the z-stacks was performed. Spherical slices were obtained as described for the



208 equatorial, anterior and posterior planes by measuring the mean radial DR profile for each  
209 of the planes in the z-stack. We then obtained the DR distribution for each of these planes.  
210 The same procedure was performed in conical sections at different angles from the center  
211 of the lens to obtain the DR profile for each cone. By finding the maximum DR using the  
212 polynomial fit described previously and plotting it for the two spatial distributions, one  
213 can observe how the radial position of the maximum remains constant for the conical  
214 slices but not for the parallel slices, proving the geometry is spherical (Supplementary  
215 Figure 4). This analysis confirmed that the observed DR patterns were an intrinsic  
216 property of the lens and were not artifacts.

### 217

### 218 **Loss of Aqp0a function regionally disrupts macromolecular crowding in the lens**

219 To understand the roles of Aqp0a and Aqp0b in the lens water homeostasis, and therefore  
220 macromolecular crowding, spatial studies of DR were carried out in null mutants  
221 previously generated by CRISPR-Cas9 gene editing (21). We focused on 4 dpf, as this  
222 stage follows loss of organelles from the lens nucleus and embryos have hatched, but the  
223 signal from the lens is still strong and not obscured by lens density and peripheral eye  
224 structures. Furthermore, our DR analysis during development showed that DR is lower in  
225 the nucleus at 4 dpf suggesting maturation of the macromolecular crowding and likely lens  
226 optics. See Supplementary Figure 9 for ACDAN intensity images to DR transformation  
227 data. Equatorial images of ACDAN emission revealed uniformly lower DR in *aqp0a*<sup>-/-</sup>  
228 mutant lenses (Figure 5A2) compared with WT (Figure 5A1) and swollen cells with high  
229 DR, particularly in the cortex in double *aqp0a*<sup>-/-</sup>/*aqp0b*<sup>-/-</sup> mutant lenses (Figure 5A4).  
230 Furthermore, double *aqp0a*<sup>-/-</sup>/*aqp0b*<sup>-/-</sup> mutant lenses had increased diameters  
231 (Supplementary Figure 5B), while the other three genotypes were indistinguishable,  
232 indicating that the whole lens in double *aqp0a*<sup>-/-</sup>/*aqp0b*<sup>-/-</sup> mutants swelled. In contrast, DR  
233 levels and distribution in *aqp0b*<sup>-/-</sup> mutants (Figure 5A3) appeared very similar to WT  
234 (Figure 5A1), with lower DR in the nucleus and elevated DR more peripherally. Mean DR  
235 values as a function of lens depth confirmed that *aqp0a*<sup>-/-</sup> mutant lenses had a lower DR,  
236 particularly in the cortex, compared to other genotypes (Figure 5B,  $r/a > 0.4$ ). There was  
237 variability in phenotype penetrance in double *aqp0a*<sup>-/-</sup>/*aqp0b*<sup>-/-</sup> mutant lenses  
238 (Supplementary Figure 10), as previously observed (21). However, double mutant lenses  
239 had higher mean DR in the outer cortex compared to WT and *aqp0a*<sup>-/-</sup> mutant lenses  
240 (Figure 5B,  $r/a > 0.6$ ), and the maximum DR value was closer to the lens periphery (Figure



241 5C). Analyses of masked regions of the lens confirmed that the epithelium and cortex of  
242 *aqp0a*<sup>-/-</sup> mutant lenses, but not the lens nucleus, had a lower DR than WT (Figure 5D)  
243 when measured at these equatorial planes.

244 We next examined the lens poles (see Supplementary Table 1 for specific locations). At  
245 the anterior pole we have previously shown that *aqp0a*<sup>-/-</sup> mutants show severe suture  
246 defects at older stages (21). ACDAN emission analysis in anterior lens planes revealed  
247 that *aqp0a*<sup>-/-</sup> mutant lenses had lower DR (Figure 6A2) than other genotypes, which were  
248 all quite similar to one another (Figure 6A1, 3-4). This lower DR in *aqp0a*<sup>-/-</sup> compared to  
249 the other genotypes was confirmed by comparison of the mean DR of the fiber cells  
250 (Figure 6B3), including the suture (Figure 6B4). In contrast, cells in the epithelium  
251 showed no difference (Figure 6B2, Supplementary Figure 11A). The maximum DR signal  
252 was closer to the center in *aqp0a*<sup>-/-</sup>/*aqp0b*<sup>-/-</sup> double mutant lenses than WT (Supplementary  
253 Figure 11B).

254 At the posterior pole, *aqp0a*<sup>-/-</sup> lenses also exhibited lower DR than other genotypes  
255 (Figure 6C2), while double *aqp0a*<sup>-/-</sup>/*aqp0b*<sup>-/-</sup> mutant lenses had regions with higher DR  
256 that appeared as swollen cells (Figure 6C4). Cell morphology was severely disrupted, and  
257 these lenses lacked a clear convergence of a suture compared to the other genotypes  
258 (Figure 6C1-3). Statistically, *aqp0a*<sup>-/-</sup> had a lower DR in the cortex and sutural regions of  
259 the posterior cortex compared to the other genotypes, while the double mutant was not  
260 statistically different (Figure 6D1-3), likely due to variability in the severity of the  
261 phenotype (See Supplementary Figure 10). The mean DR was relatively even around the  
262 sutures within ~20 μm radius, with a dip at the center (Supplementary Figure 11C), which  
263 is likely why the maximum DR was very scattered around this value (Supplementary  
264 Figure 11D). Interestingly, the DR was overall lower in whole lenses, fiber cells, and  
265 sutures at the anterior pole than the posterior pole in all genotypes (Supplementary Figure  
266 8).

267 Reconstructions of z-stacks in axial orientations confirmed the DR patterns and  
268 phenotypes observed in lenses imaged as single optical slices (Figure 7). Taken together,  
269 these results suggest that both zebrafish Aqp0s facilitate fluid efflux, disruption of which  
270 leads to lower DR and swollen fiber cells in the lens periphery, but that only Aqp0a  
271 facilitates influx, which is required to develop and maintain a higher DR throughout the  
272 lens cortex.

## 274 **Restoration of Aqp0 lacking water transport function fails to rescue macromolecular** 275 **crowding defects in Aqp0-deficient lenses**

276 To test whether it is the water transport property of the Aqp0s that is required for  
277 establishment and maintenance of lens water homeostasis, we employed WT and water-  
278 transport-dead aquaporin 0 DNA constructs and tested their ability to rescue *aqp0a*<sup>-/-</sup> and  
279 *aqp0a*<sup>-/-</sup>/*aqp0b*<sup>-/-</sup> mutant lens DR phenotypes. Aquaporin 0 from the killifish (*Fundulus*  
280 *heteroclitis*), MIPfun, was used to rescue the DR phenotype. Transiently expressed  
281 MIPfun has previously been able to rescue embryonic cataract due to knock-down of  
282 Aqp0a or Aqp0b, therefore, it is likely to encompass functions of both zebrafish Aqp0s,  
283 while displaying similar, high water permeability of zebrafish Aqp0s compared to  
284 mammalian AQP0 (22, 36). Mosaics with strong expression of the transgenesis marker,  
285 mCherry, were selected for analysis (Figure 8B). The observed phenotypes varied due to  
286 variability in the mutant phenotypes' penetrance, especially of the double *aqp0a*<sup>-/-</sup>/*aqp0b*<sup>-/-</sup>  
287 mutant (see Supplementary Figure 10), and were further exacerbated by mosaicism of the  
288 rescue. Therefore, here we report the most consistent phenotypes with examples.

289 Injection of either rescue construct into WT lenses did not affect the lens DR or  
290 morphology (Figure 8C2, 3). WT MIPfun rescued the low DR of *aqp0a*<sup>-/-</sup> (Figure 7D2),  
291 and the high DR of swollen cells in double *aqp0a*<sup>-/-</sup>/*aqp0b*<sup>-/-</sup> mutant was also less severe  
292 (Figure 7E2). Both of these transgenics appeared more like the uninjected WT lens  
293 (Figure 7C1) compared to uninjected mutant lenses (Figure 7D1, E1). The water-  
294 transport-dead mutant construct, MIPfunN68Q, failed to rescue the mutant phenotypes  
295 and made them more severe (Figure 7D3, E3). This fact confirms that the water transport  
296 function is essential for Aqp0a, and for Aqp0b when Aqp0a is also missing, in  
297 establishing and maintaining lens water homeostasis, and thus macromolecular crowding  
298 environment in the lens cortex.

## 300 **Discussion**

301 To address macromolecular crowding in the zebrafish lens development and to test the  
302 requirements of Aqp0 on its homeostasis, we used hyperspectral imaging of the  
303 solvatochromic probe ACDAN as a nano-sensor able to measure water activity in living  
304 zebrafish lenses. Since water is the most abundant dipole active molecule within cells,  
305 interactions with macromolecules can be detected by changes in ACDAN fluorescence  
306 resulting in a continuum of water dipolar relaxation (DR) that ultimately gives a read-out

307 of cellular water dynamics in the ACDAN nano-environment (29). Notice that ACDAN  
308 can relax only the few water molecules in close proximity (Angstrom range), and that  
309 water relaxation depends on water concentration (water/solute ratio) and the water  
310 activity. This last concept refers to the possibility of sensing water with different rotational  
311 times, which happens when water is interacting with molecules (confined water), and its  
312 relaxation is compromised when compared with bulk water (nanosecond vs. picosecond  
313 relaxation time, respectively)(32). Molecular crowding can modify both, the water/solute  
314 ratio and the water activity, and here we demonstrate that water DR, as measured with  
315 ACDAN fluorescence, provides an accurate measurement of crystallin protein crowding in  
316 solution (Figure 1).

317 The 2D and 3D imaging analysis tools developed in this work allowed for a consistent,  
318 partially-automated spatial and temporal study of water DR. This customized approach is  
319 crucial to quantify the regional lens water DR distribution enabling analysis and  
320 comparison of hundreds of *in vivo* optical lens slices. The intensity image of the ACDAN  
321 fluorescence (Supplementary Figure 6A, 9A) reveals no relevant information about the  
322 water DR distribution across the lens. However, transformation of the hyperspectral data  
323 into the phasor plot reveals a clear map of the water DR by using the reciprocity principle  
324 to generate the macromolecular crowding map at subcellular resolution in the lens  
325 (Supplementary Figure 6C, 9C). In the water DR image, our color scale represents the  
326 spectral shift identified at the phasor by the phase change (Figure 2B and C). Therefore,  
327 the water DR image (Figure 2C) highlights the power of this spectroscopic approach for *in*  
328 *vivo* lens imaging.

329 The first finding was that DR in the lens (regardless of the development stage, Figure 3)  
330 was lower than the most concentrated crystallin solution (Figure 1C). In absolute units, the  
331 lowest water DR obtained for the ACDAN in living lenses was ~30 DR, which is much  
332 lower when compared to ~95 DR found in concentrated crystallin solution (340 mg/ml).  
333 This result indicates that the water in the interior of the lens cells is more confined and is  
334 suggestive of a gel-like matrix compared with solutions (37, 38). This outcome is in line  
335 with a higher total concentration of different crystallins in the *in vivo* lens (up to 60% total  
336 mass) compared to what can be reached in solution due to crystallin aggregation (6). *In*  
337 *vivo* aggregation is largely prevented by chaperones in the lens (39). Furthermore, lens cell  
338 compaction, cytoskeletal and intermediate proteins, lipids, and many more  
339 macromolecular crowders required for normal lens refractive properties contribute to its

340 unique macromolecular environment. Thus, within the lens nucleus water is strongly  
341 confined (low-activity), limiting the possibility of ACDAN to relax it, emphasizing the  
342 tight control of the macromolecular crowding for cellular and lens proper function.

343 The DR parameter from the spectral phasor of ACDAN hyperspectral imaging in the  
344 developing zebrafish lens reveals a progressively lower DR signal in the lens nucleus  
345 compared to the cortex, consistent with previous evidence of fiber cell compaction,  
346 concentration of crystallins (34), thereby increasing the protein to water ratio in the lens  
347 nucleus. Interestingly, ACDAN hyperspectral imaging reveals that water is handled  
348 differently during development at the anterior and posterior zebrafish lens sutures, likely  
349 the result of regional differences in water influx in early development. Notice that the  
350 variation in DR values found in the lens implies significant spatial and temporal changes  
351 in the macromolecular crowding compared with the water DR variation in response to the  
352 crystallin concentration in solution. Our analyses of *aqp0a*<sup>-/-</sup> and/or *aqp0b*<sup>-/-</sup> mutants  
353 unravels that while Aqp0a plays an essential and unique role in the regulation of water  
354 homeostasis, Aqp0b plays a secondary role that is revealed with the loss of both Aqp0s.  
355 This result is consistent with previous studies suggesting divergent functions for the two  
356 zebrafish Aqp0s, with Aqp0b more important in other functions in lens fiber cells, such as  
357 adhesion (21).

358 In addition to water, macromolecular crowding is affected by pH, ion concentration, and  
359 electrochemical gradients. In mature mammalian lenses pH decreases (40), intracellular  
360 Na<sup>+</sup> (41) and Ca<sup>2+</sup> (42) concentrations increase, hydrostatic pressure increases (43) and the  
361 plasma membrane depolarizes from ~-70 to ~-30 mV as a function of lens depth from the  
362 periphery to the center of the lens nucleus (Figure 9A)(8). Using ACDAN, we  
363 characterized the development of DR as lenses acquire these characteristics. Most striking  
364 is the decrease in DR in the lens nucleus with development, with the maximum DR  
365 shifting to the cortex (see Figure 3). This shift in the DR maximum is evident at 4 dpf  
366 (lens diameter ~100-120 μm). Interestingly, at 3 dpf, the highest DR was measured in the  
367 center of the lens, similar to earlier stages, despite the lens nucleus having lost its  
368 organelles by 65 hours post-fertilization (35), and appearing tightly packed  
369 morphologically (24, 44). This high DR index at 3 dpf suggests that water has not been  
370 transported out of the nucleus and the macromolecular crowding of the lens nucleus is still  
371 ongoing and that the optics are immature.

372 It is interesting to discuss these results in the context of recent study on organelle  
373 degradation in the lens by PLAAT phospholipases (for phospholipase  
374 A/acyltransferase)(45). Morishita et al. demonstrated that Plaata 1 is crucial for organelles  
375 degradation; since without organelle degradation, transparency and required refractive  
376 properties of the lens cannot be achieved. Our decrease in water DR in the normal lens  
377 nucleus after 4 dpf correlates with the results of Morishita, where they found a dramatic  
378 spatial and temporal reorganization the lens macromolecular environment. Moreover, our  
379 *aqp0a*<sup>-/-</sup> and double mutant *aqp0a*<sup>-/-</sup>/*aqp0b*<sup>-/-</sup> results show that even with all correct  
380 PLAAT machinery resulting in specified organelle degradation, it is the macromolecular  
381 crowding and water homeostasis that ultimately dictate the optical properties of the lens.  
382 Future studies should focus on the change in lens DR transition from 3-4 dpf to investigate  
383 how it is affected by pH, ion concentration, or electrochemical gradients, and even  
384 changes in PLAAT machinery activity.

385 Hyperspectral imaging of ACDAN also revealed striking differences in the DR signal in  
386 the anterior and posterior regions of the lens. DR peaked in the posterior lens around 4-5  
387 dpf in the cortex and suture, and then dropped at older stages (see Figure 4). The zebrafish  
388 lens germinal zone is further posterior at embryonic and larval stages (44) than in  
389 mammalian lenses. It is therefore likely that increased water influx is facilitated in this  
390 region to allow rapid growth and elongation of fiber cells, reflected by high DR. As lenses  
391 mature, the germinal zone shifts more anteriorly towards the center of the lens in the  
392 optical axis, correlated with a reduced DR at the posterior pole. Newly formed sutures  
393 tighten leading to low DR at both poles.

394 A net influx of ions and fluid in the inner cortex and net efflux in the outer cortex at the  
395 equator of the mammalian lens is crucial for the microcirculation system that delivers  
396 nutrients and removes waste from deeper lens tissue (reviewed by Donaldson et al)(10).  
397 Our DR analyses with ACDAN support this model and suggest that both zebrafish Aqp0s  
398 facilitate fluid efflux, but only Aqp0a facilitates influx (Figure 9). There is no evidence of  
399 extracellular space dilations, which would indicate that cell membranes have separated  
400 due to loss of adhesion. Therefore, it is unlikely that the loss of presumptive adhesive  
401 property of Aqp0b leads to the phenotype observed.

402 In this model derived from our work (Figure 9), loss of Aqp0a results in a reduction of  
403 water entering the lens, and thus the intracellular environment of the cortex is more  
404 crowded, resulting in lower DR values in all cortical regions. When both, Aqp0a and

405 Aqp0b are missing, both fluid influx and efflux are disrupted, resulting in cell swelling in  
406 the periphery, particularly near the posterior pole, and shrinkage in the deeper cortex. This  
407 swelling is marked by high DR in the swollen cells, indicative of lower macromolecular  
408 crowding. Any role for Aqp0b in water influx appears to be dispensable and compensated  
409 by Aqp0a, as *aqp0b*<sup>-/-</sup> lenses resemble WT. Anterior and posterior poles of *aqp0a*<sup>-/-</sup>  
410 mutants have reduced DR compared to WT, indicating a reduced influx throughout the  
411 lens cortex (see Figure 6). Aqp0a water transport function near the poles correlates with  
412 sutures and lens nucleus' centralization defects. This transport fails in *aqp0a*<sup>-/-</sup> at older  
413 stages (21). In contrast to the cortex, our DR data suggest that Aqp0a and/or Aqp0b are  
414 not essential for the maintenance of water homeostasis in the zebrafish lens nucleus, at  
415 least at 4 dpf.

416 Alternatively, alteration in DR and cell swelling in double mutants could reflect a  
417 completely separate role for Aqp0b in another function in lens fiber cells, such as cell  
418 adhesion. However, since *aqp0b*<sup>-/-</sup> mutants lenses look like WT, it is likely that the loss of  
419 its presumptive adhesive properties is compensated by other mechanisms, such as gap  
420 junctions. Our rescue experiments provide evidence to support the model that the water  
421 transport functions of Aqp0a and Aqp0b are required for proper macromolecular  
422 crowding, and by inference water homeostasis (see Figure 8). We show that WT MIPfun,  
423 which likely possesses functions of both zebrafish Aqp0s, reduces the severity of the DR  
424 reduction in *aqp0a*<sup>-/-</sup> mutants, most likely by restoring the water influx. WT MIPfun also  
425 reduces the severity of cell swelling in double mutants, consistent with restoration of  
426 water influx and efflux. In contrast, mutant MIPfun constructs lacking water transport  
427 function (MIPfunN68Q) fail to rescue the DR phenotypes, and exacerbates its severity.  
428 The introduction of a non-functional form of Aqp0 could be more detrimental than a  
429 missing Aqp0, as AQP0 monomers have been shown to work cooperatively in a tetramer  
430 (46). Thus, the mutant MIPfunN68Q could disrupt the function of the native Aqp0s,  
431 exacerbating the phenotype. These data confirm the essential role of Aqp0a and Aqp0b as  
432 water channels for maintenance of fluid influx/efflux balance in the lens cortex, and thus  
433 overall lens homeostasis due to a tight macromolecular crowding tuning.

434 In conclusion, macromolecular crowding is essential in all living cells, and in this study  
435 we employed hyperspectral imaging of the nano-environment sensor, ACDAN, to  
436 describe the development of macromolecular crowding in the living zebrafish lens at a  
437 subcellular level. The combination of spectroscopy tools and imaging processing analysis



438 enabled us to report the very high macromolecular crowding in the lens compared with a  
439 high concentration of crystalline in solution. Besides, we show that as lens optics develop,  
440 DR increases indicating increased macromolecular crowding in the lens nucleus from 2-4  
441 dpf. We also show that *aqp0a*<sup>-/-</sup> mutant lens cortex had reduced macromolecular crowding  
442 and cell swelling in double *aqp0a*<sup>-/-</sup>/*aqp0b*<sup>-/-</sup> mutant lenses. These results indicate that both  
443 zebrafish Aqp0s facilitate fluid efflux in the lens cortex, but only Aqp0a facilitates influx  
444 in the living zebrafish lens. In the future, we will test the requirements of amino acids  
445 known to regulate Aqp0 water transport by external Ca<sup>2+</sup> and pH on DR on water influx  
446 and efflux in the lens cortex. This study also provides tools and methods for studying  
447 water dynamics and macromolecular crowding mechanisms in other tissues in living  
448 organisms.

## 450 **Materials and Methods**

### 451 **Zebrafish husbandry**

452 The animal protocols used in this study adhered to the ARVO Statement for the Use of  
453 Animals in Ophthalmic and Vision Research and have been approved by the Institutional  
454 Animal Care and Use Committee of University of California, Irvine protocol #AUP-20-  
455 145. Zebrafish (AB strain) were raised and maintained under standard laboratory  
456 conditions (47), except methylene blue was excluded from the embryonic media (EM) as  
457 this yielded background fluorescence during hyperspectral imaging. The *aqp0a*<sup>-/-</sup> and/or  
458 *aqp0b*<sup>-/-</sup> mutants were generated as previously described (21). 0.003% 1-phenyl-2-  
459 thiourea (Sigma, St Louis, MO, P7629) was added to EM from 20-24 h postfertilization to  
460 prevent pigment formation. From 6 dpf, larvae were fed a diet of live rotifers (47).

### 462 **Rescue constructs**

463 For rescue of mutant phenotypes, the Tol2 transposable element system (48) was used to  
464 stably integrate WT *Tg(HuβB1cry:MIPfun-IRES-mCherry)* or water-channel-dead  
465 *Tg(HuβB1cry:MIPfunN68Q-IRES-mCherry)* constructs of the  
466 *Heteroclitisfundulus* aquaprotein 0 (MIPfun). A 200 bp region of the human βB1 crystallin  
467 promoter (49) was used to drive expression specifically in the lens, and only lenses  
468 strongly expressing the transgenesis marker (IRES-mCherry) were used to assess rescue of  
469 the phenotype. By using spectral phasors, we were able to extract ACDAN data without



470 interference from mCherry (50), so it was selected as a transgenic marker. Previously,  
471 MIPfun had successfully rescued MO-knockdown-induced transient cataracts at 3 dpf of  
472 Aqp0a or Aqp0b, so it is thought to encompass properties of both zebrafish Aqp0s (23),  
473 MIPfunN68Q mutation results in an inactive water channel aquaporin (23), and so was  
474 used to test the requirement for water channel function to rescue DR phenotypes.

### 475 476 **Crystallin preparation**

477 The Antarctic toothfish (*Dissostichus mawsoni*)  $\gamma$ M8d crystallin (GenBank, DQ143983)  
478 sample was kindly provided by Dr. Jan Bierma from Dr. Rachel Martin's lab. The  
479 recombinant proteins were grown, purified and stored as previously described (51).  
480 Dilution series from 0-340 mg/mL were made in buffer (10 mM phosphate pH 6.9, 50  
481 mM NaCl, 0.05% NaN<sub>3</sub>). Concentration was measured by a Nanodrop at absorbance  
482 280nm, and corrected by  $\epsilon_{280}=1.063$  mL/mg at 1 nm.

### 483 484 **ACDAN staining**

485 ACDAN (Toronto Research Chemicals, North York, ON-Canada, A168445) was  
486 dissolved in DMSO at 67 mM stock concentration, and added fresh to EM at a final  
487 concentration of 100  $\mu$ M for overnight incubation of zebrafish prior to imaging. ACDAN  
488 was added at a final concentration of 5  $\mu$ M 10 minutes prior to imaging of the crystallin  
489 preparation.

### 490 491 **Hyperspectral imaging**

492 Embryos and larvae were anesthetized in EM with 0.0165% w/v tricaine (Sigma, St.  
493 Louis, MO, A5040) and mounted in 1% low melt agarose (Sigma, St Louis, MO, T9284)  
494 in 35 mm glass bottom microwell dishes (MatTek Corporation, Ashland, MA, P35G-1.5-  
495 14-C) with the eye against the coverslip, with the optical path perpendicular to the  
496 imaging plane (Supplementary Figure 1). Imaging planes were kept consistent between  
497 lenses of specific age as summarized (Supplementary Table 1).

498 Hyperspectral fluorescence images were acquired using a Zeiss LSM710 META  
499 microscope (Carl Zeiss, Jena GmbH) with a 40 $\times$  water immersion objective 1.2 N.A. (Carl  
500 Zeiss, Jena GmbH). The microscope was coupled to a Ti:Sapphire laser (Spectra-Physics

Mai Tai, Newport Beach, CA) which produces 80 femtosecond pulses with a repetition rate of 80 MHz. A two-photon wavelength of 780 nm was used for ACDAN excitation. The average laser power illuminating the sample was maintained at the mW level. Hyperspectral detection was performed with the Lambda Mode configuration of the Zeiss LSM710 META, which consists of a 32 channel GaAsP array photomultiplier tube. The hyperspectral range collected was from 416 to 728 nm; each of the 32 channels had a bandwidth of 9.7 nm. Image acquisition was performed with a frame size of 1024×1024 pixels, and a pixel size of 100 nm. Hyperspectral data was processed using a custom routine developed in MATLAB (The Mathworks, Inc., Boston, MA), described in the following sections.

### Spectral phasor of hyperspectral Image

The image processing pipeline we developed uniquely for analyzing spectral microscopy images of ACDAN emission in the zebrafish eye lenses is based on the spectral phasor transform. This integral transform obtains two quantities (named G and S) from the spectral intensity distribution at each pixel which are used to create the phasor plot of an image (52). The Cartesian coordinates (G,S) of the spectral phasor plot are defined by the following expressions:

$$G = \frac{\int_{\lambda_0}^{\lambda_f} I(\lambda) \cos(\omega n(\lambda - \lambda_0)) d\lambda}{\int_{\lambda_0}^{\lambda_f} I(\lambda) d\lambda} \quad (1)$$

$$S = \frac{\int_{\lambda_0}^{\lambda_f} I(\lambda) \sin(\omega n(\lambda - \lambda_0)) d\lambda}{\int_{\lambda_0}^{\lambda_f} I(\lambda) d\lambda} \quad (2)$$

where  $I(\lambda)$  is the intensity as a function of wavelength at a particular pixel, measured in the interval  $(\lambda_0, \lambda_f)$  that depends on the detector spectral range. The parameter  $n$  is the harmonic i.e. the number of cycles of the trigonometric function that are fit in the wavelength range by means of the angular frequency  $\omega$ :

$$\omega = \frac{2\pi}{\lambda_f - \lambda_0} \quad (3)$$

In practice one does not have a continuum of intensity values in the spectral direction, but rather a discrete number corresponding to the number of detectors that cover the spectral

529 range. For computational purposes, the spectral phasor transform expressed as a discrete  
530 transform in terms of the spectral channel is (53):

$$531 \quad G = \frac{\sum_c^{N_c} I(c) \cos(2\pi c/N_c)}{\sum_c^{N_c} I(c)} (4)$$

$$532 \quad S = \frac{\sum_c^{N_c} I(c) \sin(2\pi c/N_c)}{\sum_c^{N_c} I(c)} (5)$$

533 where now  $I(c)$  is the pixel intensity at channel  $c$  and  $N_c$  is the total number of channels. It  
534 is important that even if the number of spectral channels is small (in our case 32), the  
535 coordinates  $S$  and  $G$  are quasi continuous, due to the fact that the photon counts in each  
536 pixel and channel  $I(c)$  are high enough ( $\sim 102$ ) to allow a wide range of values in the  
537 coordinates  $S$  and  $G$ .

538 The spectral phasor position of a particular pixel carries information about the spectral  
539 intensity profile of that pixel, allowing us to distinguish minute differences in the spectral  
540 emission. In polar coordinates, the angle carries the information regarding the spectral  
541 center of mass, and the radial direction carries information on the spectra broadness.

542 Most importantly though, spectral phasors follow rules of vector algebra, known as the  
543 linear combination of phasors (30, 54). This property refers to the additivity of  
544 components and allows the geometrical calculation of mixed pure environments. Pixels  
545 that contain a combination of two independent fluorescent species will appear on the  
546 phasor plot in a position that is a linear combination of the phasor positions of the two  
547 independent spectral species. The relative intensity fractions of the components determine  
548 the coefficients of the linear combination.

549 The other crucial property of the phasor plot is known as the reciprocity principle which  
550 refers to the fact that every point on the phasor plot corresponds to a pixel on the image  
551 and vice-versa, i.e. there is a bidirectional mapping between the image and the points. It is  
552 important to note that this operation is not a mathematical inversion; given the coordinates  
553 of a pixel in the phasor plot one cannot recover the photon spectral distribution of that  
554 pixel. This reciprocity maintained between the raw data and the phasor space  
555 representation allows us to select a region of interest in the phasor plot distribution and  
556 display the location of those pixels in the original image. An in-depth description of the  
557 properties of spectral phasor plots is given in references (32, 55).

558 The phasor transform applied to each pixel of an image produces a point in the phasor plot  
559 and all the pixels of an image together comprise the phasor plot. In the case of the  
560 particular range of wavelengths of our experiments and the range of our spectral detector  
561 array, this distribution was in a region between the first and second quadrant of the phasor  
562 plot. After plotting all the spectral images in the spectral phasor plot (a total of 420  
563 images) we manually defined our region of interest in order to include all the points in the  
564 phasor plot in terms of a phase angle interval. This phase angle interval  $[\varphi_0, \varphi_f]$  was chosen  
565 at  $[65^\circ, 115^\circ]$  which approximately corresponds to the range  $[470-520]$ nm. This interval  
566 was then used to define our dipolar relaxation index as follows:

$$567 \quad DR \equiv 100 \frac{\arctan(S/G) - \varphi_0}{\varphi_f - \varphi_0} (6)$$

568 This quantity was then mapped to a particular lookup table (colormap) in order to color-  
569 code each pixel in the images according to the position of the pixel's phasor transform in  
570 this interval (see Figure 2B-C). This color-coded image therefore now corresponds to a  
571 value in the interval  $[0, 100]$ , in turn corresponding to the aforementioned angular interval.  
572 It is this magnitude we refer to as the dipolar relaxation index (DR)(33). This DR  
573 definition does not require any prior knowledge of spectral characteristics of the sample.

574 A special consideration during the image processing steps regards saturated pixels in the  
575 images. This circumstance is uncommon since during the acquisition we ensured the use  
576 of a fraction of the dynamic range, but on rare occasions with a few outlier pixels this  
577 condition did not hold. Because in such pixels the spectral distribution is capped at some  
578 point, an error was introduced in the computation of the phasor transform. For this reason  
579 these pixels were marked before computing the phasor transform and the G and S phasor  
580 values for these pixels were interpolated a posteriori by averaging the neighboring pixels'  
581 G and S values.

### 582 **Imaging processing routine for spatial/temporal study of the lens**

584 In order to perform the spatial analysis, lenses were segmented from the background. Due  
585 to the fact that the lenses are not perfectly circular, and the challenge to align lenses  
586 perfectly to the imaging optical axis, and most importantly that the radial geometry of the  
587 cells conforming the lens does not in general match with the geometric center of the lens,  
588 the segmentation was performed in a semi-automatic way. For each image (420 total

589 images), we manually marked six points around the edge of the lens, which were then  
590 used to automatically interpolate an arc joining them while forcing continuity in the arc  
591 and its derivative. The central point in the lens was used as the arc anchor, which had also  
592 been manually marked. This segmentation allowed tracing a total of 360 radii and  
593 obtaining the mean radial DR values in all directions. These curves were then interpolated  
594 to have equal numbers of points and were used to construct a Cartesian unfolding of the  
595 DR distribution of the lens (Supplementary Figure 2). From this Cartesian unfolded lens -  
596 one direction being the radius and the other the angle - the mean radial DR profile was  
597 obtained by projecting the mean DR in the angular direction (Figure 2D).

598 From the original circular geometry, a regional separation was applied to obtain the mean  
599 DR in each of the relevant regions of the lens. These regions were defined as annular  
600 bands taking into account the irregular geometry of the lens section, i.e. if the center of the  
601 lens is not the geometric center, in one direction the regional bands are tighter than in the  
602 other. For the equatorial plane a total of four regions were defined; epithelium ( $r/a < 0.93$ ),  
603 outer cortex ( $0.55 < r/a < 0.93$ ), inner cortex ( $0.30 < r/a < 0.55$ ) and core ( $r/a < 0.30$ ). For the  
604 anterior plane, the epithelium was manually segmented and both for the anterior and  
605 posterior planes, the suture was defined as the central circle of radius  $10\mu\text{m}$ . The image  
606 processing experimental pipeline is represented in Supplementary Figure 3.

## 607

## 608 **Statistical analysis**

609 When plotting results, we performed several fits to the data points. In such cases the  
610 coefficient of determination ( $R^2$ ; unity minus the sum of squared distances to the fit over  
611 the sum of squared distances to the mean) is provided to measure the goodness-of fit of  
612 the models used. Furthermore, a shaded area with a chosen confidence interval was also  
613 drawn in the background.

614 When comparing two independent distributions, the one-side Kolmogorov Smirnov test  
615 for normality was performed in each of the two distributions. In the cases in which the test  
616 was passed, a Student t-test was used to statistically test if the data came from normal  
617 distributions with equal means. In the cases the normality test was not passed, the  
618 Wilcoxon rank sum test was used to statistically measure the chance that the two sets of  
619 points were drawn from distributions with equal medians.

620 When comparing more than two independent distributions, again the Kolmogorov  
621 Smirnov test was used to test for normality of each distribution, and in the successful  
622 cases an ANOVA test was performed against the hypothesis that all groups are drawn  
623 from distribution with equal means. When the normality test failed the Kruskal Wallis test  
624 was used instead (56). In both cases, for further comparison of pairwise distributions for  
625 equal means, Scheffé's procedure was chosen as it proved to be the most conservative.

## 627 References

- 628 1. B. Akabayov, S. R. Akabayov, S. J. Lee, G. Wagner, C. C. Richardson, Impact of  
629 macromolecular crowding on DNA replication. *Nat. Commun.* 4 (2013),  
630 doi:10.1038/ncomms2620.
- 631 2. P. Dey, A. Bhattacharjee, Role of Macromolecular Crowding on the Intracellular  
632 Diffusion of DNA Binding Proteins. *Sci. Rep.* 8, 1–11 (2018).
- 633 3. G. Nettesheim, I. Nabti, C. U. Murade, G. R. Jaffe, S. J. King, G. T. Shubeita,  
634 Macromolecular crowding acts as a physical regulator of intracellular transport. *Nat. Phys.*  
635 16, 1144–1151 (2020).
- 636 4. M. A. Mourão, J. B. Hakim, S. Schnell, Connecting the dots: The effects of  
637 macromolecular crowding on cell physiology. *Biophys. J.* 107, 2761–2766 (2014).
- 638 5. A. A. M. André, E. Spruijt, Liquid–liquid phase separation in crowded  
639 environments. *Int. J. Mol. Sci.* 21, 1–20 (2020).
- 640 6. G. J. Wistow, J. Piatigorsk, Lens crystallins: the evolution and expression of  
641 proteins for a highly specialized tissue. *Annu. Rev. Biochem.* 57, 479–50 (1988).
- 642 7. P. J. Donaldson, A. C. Grey, B. MaceoHeilman, J. C. Lim, E. Vaghefi, The  
643 physiological optics of the lens. *Prog. Retin. Eye Res.* 56, e1–e24 (2017).
- 644 8. R. T. Mathias, J. Kistler, P. Donaldson, The Lens Circulation. *J. Membr. Biol.* 216,  
645 1–16 (2007).
- 646 9. R. T. Mathias, J. L. Rae, Transport properties of the lens. *Am. J. Physiol. Physiol.*  
647 249, C181–C190 (1985).
- 648 10. P. J. Donaldson, K. S. N. Chee, J. C. Lim, K. F. Webb, Regulation of lens volume:  
649 Implications for lens transparency. *Exp. Eye Res.* 88, 144–150 (2009).
- 650 11. R. S. Petrova, K. F. Webb, E. Vaghefi, K. Walker, K. L. Schey, P. J. Donaldson,  
651 Dynamic functional contribution of the water channel AQP5 to the water permeability of  
652 peripheral lens fiber cells. *Am. J. Physiol. - Cell Physiol.* 314, C191–C201 (2018).
- 653 12. K. L. Schey, R. S. Petrova, R. B. Gletten, P. J. Donaldson, The role of aquaporins  
654 in ocular lens homeostasis. *Int. J. Mol. Sci.* 18, 1–17 (2017).
- 655 13. J. E. Hall, J. A. Freites, D. J. Tobias, Experimental and Simulation Studies of  
656 Aquaporin 0 Water Permeability and Regulation. *Chem. Rev.* 119, 6015–6039 (2019).
- 657 14. S. S. Kumari, K. Varadaraj, Intact AQP0 performs cell-to-cell adhesion.  
658 *Biochem. Biophys. Res. Commun.* 390, 1034–1039 (2009).



- 659 15. Y. Nakazawa, M. Oka, M. Funakoshi-Tago, H. Tamura, M. Takehana, The  
660 Extracellular C-loop Domain Plays an Important Role in the Cell Adhesion Function of  
661 Aquaporin 0. *Curr. Eye Res.* 42, 617–624 (2017).
- 662 16. Y. Nakazawa, M. Oka, K. Furuki, A. Mitsuishi, E. Nakashima, M. Takehana, The  
663 effect of the interaction between aquaporin 0 (AQP0) and the filensin tail region on AQP0  
664 water permeability. *Mol. Vis.* 17, 3191–3199 (2011).
- 665 17. K. M. L. Rose, R. G. Gourdie, A. R. Prescott, R. A. Quinlan, R. K. Crouch, K. L.  
666 Schey, The C terminus of lens aquaporin 0 interacts with the cytoskeletal proteins filensin  
667 and CP49. *Investig. Ophthalmol. Vis. Sci.* 47, 1562–1570 (2006).
- 668 18. J. Liu, J. Xu, S. Gu, B. J. Nicholson, J. X. Jiang, Aquaporin 0 enhances gap  
669 junction coupling via its cell adhesion function and interaction with connexin 50. *J. Cell*  
670 *Sci.* 124, 198–206 (2011).
- 671 19. X. S. Yu, J. X. Jiang, Interaction of major intrinsic protein (aquaporin-0) with fiber  
672 connexins in lens development. *J. Cell Sci.* 117, 871–880 (2004).
- 673 20. T. S. Vihtelic, J. M. Fadool, J. Gao, K. A. Thornton, D. R. Hyde, G. Wistow,  
674 Expressed sequence tag analysis of zebrafish eye tissues for NEIBank. *Mol. Vis.* 11,  
675 1083–1100 (2005).
- 676 21. I. Vorontsova, I. Gehring, J. E. Hall, T. F. Schilling, Aqp0a regulates suture  
677 stability in the zebrafish lens. *Investig. Ophthalmol. Vis. Sci.* 59, 2869–2879 (2018).
- 678 22. A. Froger, D. Clemens, K. Kalman, K. L. Németh-Cahalan, T. F. Schilling, J. E.  
679 Hall, Two distinct aquaporin 0s required for development and transparency of the  
680 zebrafish lens. *Investig. Ophthalmol. Vis. Sci.* 51, 6582–6592 (2010).
- 681 23. D. M. Clemens, K. L. Németh-Cahalan, L. Trinh, T. Zhang, T. F. Schilling, J. E.  
682 Hall, In vivo analysis of aquaporin 0 function in zebrafish: Permeability regulation is  
683 required for lens transparency. *Investig. Ophthalmol. Vis. Sci.* 54, 5136–5143 (2013).
- 684 24. I. Vorontsova, J. E. Hall, T. F. Schilling, Assessment of Zebrafish Lens Nucleus  
685 Localization and Sutural Integrity. *JoVE*.147, e59528 (2019).
- 686 25. F. Chauvigné, C. Zapater, J. A. Stavang, G. L. Taranger, J. Cerda, R. N. Finn, The  
687 pH sensitivity of Aqp0 channels in tetraploid and diploid teleosts. *FASEB J.* 29, 2172–  
688 2184 (2015).
- 689 26. G. Weber, F. J. Farris, Synthesis and spectral properties of a hydrophobic  
690 fluorescent probe: 6-propionyl-2-(dimethylamino)naphthalene. *Biochemistry*.18, 3075–  
691 3078 (1979).
- 692 27. G. Gunther, L. Malacrida, D. M. Jameson, E. Gratton, S. A. Sánchez, LAURDAN  
693 since Weber: The Quest for Visualizing Membrane Heterogeneity. *Acc. Chem. Res.*  
694 (2021), doi:10.1021/acs.accounts.0c00687.
- 695 28. H. S. Thoke, S. Thorsteinsson, R. P. Stock, L. A. Bagatolli, L. F. Olsen, The  
696 dynamics of intracellular water constrains glycolytic oscillations in *Saccharomyces*  
697 *cerevisiae*. *Sci. Rep.* 7, 1–12 (2017).
- 698 29. F. Begarani, F. D’Autilia, G. Signore, A. Del Grosso, M. Cecchini, E. Gratton, F.  
699 Beltram, F. Cardarelli, Capturing Metabolism-Dependent Solvent Dynamics in the Lumen  
700 of a Trafficking Lysosome. *ACS Nano.* 13, 1670–1682 (2019).



- 701 30. F. Fereidouni, A. N. Bader, H. C. Gerritsen, Spectral phasor analysis allows rapid  
702 and reliable unmixing of fluorescence microscopy spectral images. *Opt. Express*. 20  
703 (2012), p. 12729.
- 704 31. D. M. Jameson, E. Gratton, R. D. Hall, The Measurement and Analysis of  
705 Heterogeneous Emissions by Multifrequency Phase and Modulation Fluorometry. *Appl.*  
706 *Spectrosc. Rev.* 20, 55–106 (1984).
- 707 32. L. Malacrida, S. Astrada, A. Briva, M. Bollati-Fogolín, E. Gratton, L. A. Bagatolli,  
708 Spectral phasor analysis of LAURDAN fluorescence in live A549 lung cells to study the  
709 hydration and time evolution of intracellular lamellar body-like structures.  
710 *Biochim.Biophys.Acta - Biomembr.*1858 (2016), doi:10.1016/j.bbamem.2016.07.017.
- 711 33. L. Malacrida, E. Gratton, LAURDAN fluorescence and phasor plots reveal the  
712 effects of a H<sub>2</sub>O<sub>2</sub> bolus in NIH-3T3 fibroblast membranes dynamics and hydration. *Free*  
713 *Radic. Biol. Med.* 128, 144–156 (2018).
- 714 34. K. Wang, I. Vorontsova, M. Hoshino, K. Uesugi, N. Yagi, J. E. Hall, T. F.  
715 Schilling, B. K. Pierscionek, Optical development in the zebrafish eye lens. *FASEB J.* 34,  
716 5552–5562 (2020).
- 717 35. T. M. S. Greiling, M. Aose, J. I. Clark, Cell fate and differentiation of the  
718 developing ocular lens. *Investig.Ophthalmol.Vis. Sci.* 51, 1540–1546 (2010).
- 719 36. L. V. Virkki, G. J. Cooper, W. F. Boron, Cloning and functional expression of an  
720 MIP (AQPO) homolog from killifish (*Fundulusheteroclitus*) lens. *Am. J. Physiol. - Regul.*  
721 *Integr.Comp. Physiol.* 281, 1994–2003 (2001).
- 722 37. J. Fels, S. N. Orlov, R. Grygorczyk, The hydrogel nature of mammalian cytoplasm  
723 contributes to osmosensing and extracellular pH sensing. *Biophys. J.* 96, 4276–4285  
724 (2009).
- 725 38. G. H. Pollack, Is the cell a gel - And why does it matter? *Jpn. J. Physiol.* 51, 649–  
726 660 (2001).
- 727 39. J. Peschek, N. Braun, T. M. Franzmann, Y. Georgalis, M. Haslbeck, S. Weinkauff,  
728 J. Buchner, The eye lens chaperone alfa-crystallin forms defined globular assemblies.  
729 *Proc. Natl. Acad. Sci.* 106, 13272–13277 (2009).
- 730 40. R. T. Mathias, G. Riquelme, J. L. Rae, Cell to cell communication and pH in the  
731 frog lens. *J. Gen. Physiol.* 98, 1085–1103 (1991).
- 732 41. J. Gao, P. J. Minogue, E. C. Beyer, R. T. Mathias, V. M. Berthoud, Disruption of  
733 the lens circulation causes calcium accumulation and precipitates in connexin mutant  
734 mice. *Am. J. Physiol. - Cell Physiol.* 314, C492–C503 (2018).
- 735 42. J. Gao, X. Sun, F. J. Martinez-Wittinghan, X. Gong, T. W. White, R. T. Mathias,  
736 Connections between connexins, calcium, and cataracts in the lens. *J. Gen. Physiol.* 124,  
737 289–300 (2004).
- 738 43. J. Gao, H. Wang, X. Sun, K. Varadaraj, L. Li, T. W. White, R. T. Mathias, The  
739 effects of age on lens transport. *Investig.Ophthalmol.Vis. Sci.* 54, 7174–7187 (2013).
- 740 44. T. M. S. Greiling, J. I. Clark, Early lens development in the zebrafish: A three-  
741 dimensional time-lapse analysis. *Dev. Dyn.* 238, 2254–2265 (2009).
- 742 45. H. Morishita, T. Eguchi, S. Tsukamoto, Y. Sakamaki, S. Takahashi, C. Saito, I.  
743 Koyama-honda, N. Mizushima, Organelle degradation in the lens by PLAAT  
744 phospholipases. *Nature.*592, 1–5 (2021).

- 745 46. K. L. Németh-Cahalan, K. Kalman, A. Froger, J. E. Hall, Zinc modulation of water  
746 permeability reveals that aquaporin 0 functions as a cooperative tetramer. *J. Gen. Physiol.*  
747 130, 457–464 (2007).
- 748 47. M. Westerfield, *The zebrafish book. A guide for the laboratory use of zebrafish*  
749 *(Danio rerio)*. (Univ. of Oregon Press, Eugene., 4th ed., 2000).
- 750 48. K. M. Kwan, E. Fujimoto, C. Grabher, B. D. Mangum, M. E. Hardy, D. S.  
751 Campbell, J. M. Parant, H. J. Yost, J. P. Kanki, C. Bin Chien, The Tol2kit: A multisite  
752 gateway-based construction Kit for Tol2 transposon transgenesis constructs. *Dev. Dyn.*  
753 236, 3088–3099 (2007).
- 754 49. H. H. Hou, M. Y. P. Kuo, Y. W. Luo, B. E. Chang, Recapitulation of human  $\beta$ B1-  
755 crystallin promoter activity in transgenic zebrafish. *Dev. Dyn.* 235, 435–443 (2006).
- 756 50. S. Sameni, L. Malacrida, Z. Tan, M. A. Digman, Alteration in Fluidity of Cell  
757 Plasma Membrane in Huntington Disease Revealed by Spectral Phasor Analysis. *Sci. Rep.*  
758 8 (2018), doi:10.1038/s41598-018-19160-0.
- 759 51. J. C. Bierma, K. W. Roskamp, A. P. Ledray, A. J. Kiss, C.-H. C. Cheng, R. W.  
760 Martin, Controlling Liquid–Liquid Phase Separation of Cold-Adapted Crystallin Proteins  
761 from the Antarctic Toothfish. *J. Mol. Biol.* 430, 5151–5168 (2018).
- 762 52. L. Malacrida, D. M. Jameson, E. Gratton, A multidimensional phasor approach  
763 reveals LAURDAN photophysics in NIH-3T3 cell membranes. *Sci. Rep.* 7 (2017),  
764 doi:10.1038/s41598-017-08564-z.
- 765 53. V. Castro-Castillo, J. Gajardo, C. Sandoval-Altamirano, G. Gunther, E. Gratton, L.  
766 Malacrida, S. Sanchez, L. Malacrida, CAPRYDAA, an anthracene dye analog to  
767 LAURDAN: A comparative study using cuvette and microscopy. *J. Mater. Chem. B.* 8  
768 (2019), doi:10.1039/c9tb01738k.
- 769 54. F. Sena, M. Sotelo-Silveira, S. Astrada, M. A. Botella, L. Malacrida, O. Borsani,  
770 Spectral phasor analysis reveals altered membrane order and function of root hair cells in  
771 *Arabidopsis dry2/sqe1-5* drought hypersensitive mutant. *Plant Physiol. Biochem.* 119  
772 (2017), doi:10.1016/j.plaphy.2017.08.017.
- 773 55. L. Malacrida, E. Gratton, D. M. Jameson, Model-free methods to study membrane  
774 environmental probes: A comparison of the spectral phasor and generalized polarization  
775 approaches. *Methods Appl. Fluoresc.* 3 (2015), doi:10.1088/2050-6120/3/4/047001.
- 776 56. M. Pagano, K. Gauvreau, *Principles of biostatistics* (Duxbury, Pacific Grove, CA,  
777 2000).

## 778 **Acknowledgments**

780 The authors are grateful to Prof. David Jameson, and Prof. Paul Donaldson for reading the  
781 manuscript and for their valuable suggestions. This work was supported in part by grants  
782 NIH P41-GM103540, NIH P50-GM076516, and NIH R01-EY05661. LM is supported by  
783 the Agencia Nacional de Investigación e Innovación (ANII) grant  
784 FCE\_3\_2018\_1\_149047, FOCEM - Fondo para la Convergencia Estructural del Mercosur  
785 (COF 03/11) and Chan Zuckerberg Initiative as Imaging Scientist. We thank Ines Gehring  
786 for zebrafish husbandry and assistance in generating and maintaining the Aqp0 mutant

787 lines. We thank Drs. Jan Bierma and Rachel Martin for kindly providing the crystallin  
788 sample.

789  
790 **Author contributions:** I.V., A.V. L.M. designed experiments; I.V., A.V, B.T, L.M. carried out  
791 experiments; I.V. and A.V. analyzed the data; A.V. wrote software for data analysis, I.V.,  
792 A.V., B.T. and L.M. wrote the manuscript, L.M., E.G. T.S and J.H. corrected the  
793 manuscript.

794  
795 **Competing interests:** Authors declare that they have no competing interests  
796

797 **Data and materials availability:** Upon request, we will make the data available to other  
798 researchers. The spectral phasor analysis is part of a custom set of scripts in MATLAB.  
799 The full code is available upon request.  
800

## Figures and Tables

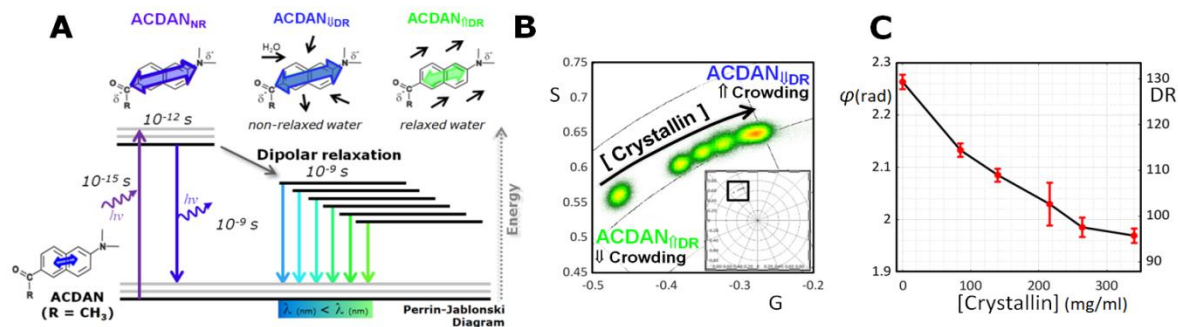

**Figure 1: Solvatochromic properties of ACDAN measure water homeostasis and macromolecular crowding.** (A) ACDAN photophysics display strong sensitivity to the polarity of the environment and solvent relaxation. In an uncrowded environment high dipolar relaxation (DR) results in a spectral red-shift, while in crowded environments low DR results in a spectral blue-shift. (B) Antarctic tooth fish  $\gamma$ M8d crystallin at concentrations of 0, 85, 140, 216, 264, and 340 mg/ml was imaged with 5  $\mu$ M ACDAN *in vitro*. A blue spectral shift was observed in response to increased macromolecular crowding, and thus a decrease in DR. (C) The mean phasor phase angle/DR show an inverse relationship with crystallin concentration (n=3). Notice the DR scale was extended over 100% to include the spectral shift found at the crystallin solutions, while lens DR was in the 0 to 100 DR.

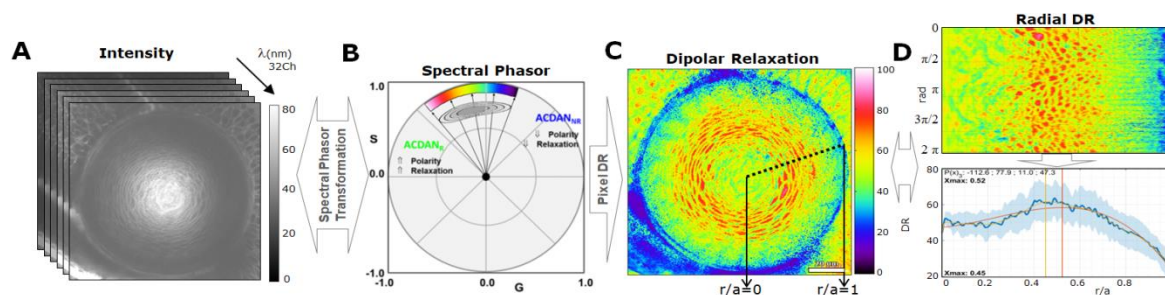

**Figure 2: Characterization of lens ACDAN emission using the phasor approach.**(A)

Hyperspectral images were transformed to the spectral phasor plot (B), which separates the signals from relaxed and unrelaxed dipolar states. (C) Dipolar relaxation (DR) values were applied back to the original image pixel-by-pixel, which were then processed for parameter extraction. (D) Radial analysis of mean DR signal from the center of the lens ( $r/a = 0$ , where  $r$  = distance from lens center,  $a$  = lens radius) to lens periphery ( $r/a=1$ ) is shown. The polar geometry is transformed to cartesian geometry, the horizontal direction being the radius, vertical angle, and the mean DR value is then graphed (bottom panel), enabling analysis of regional change of mean DR. A polynomial fit was used to estimate max DR. Details can be found in the Supplementary Figure 2.



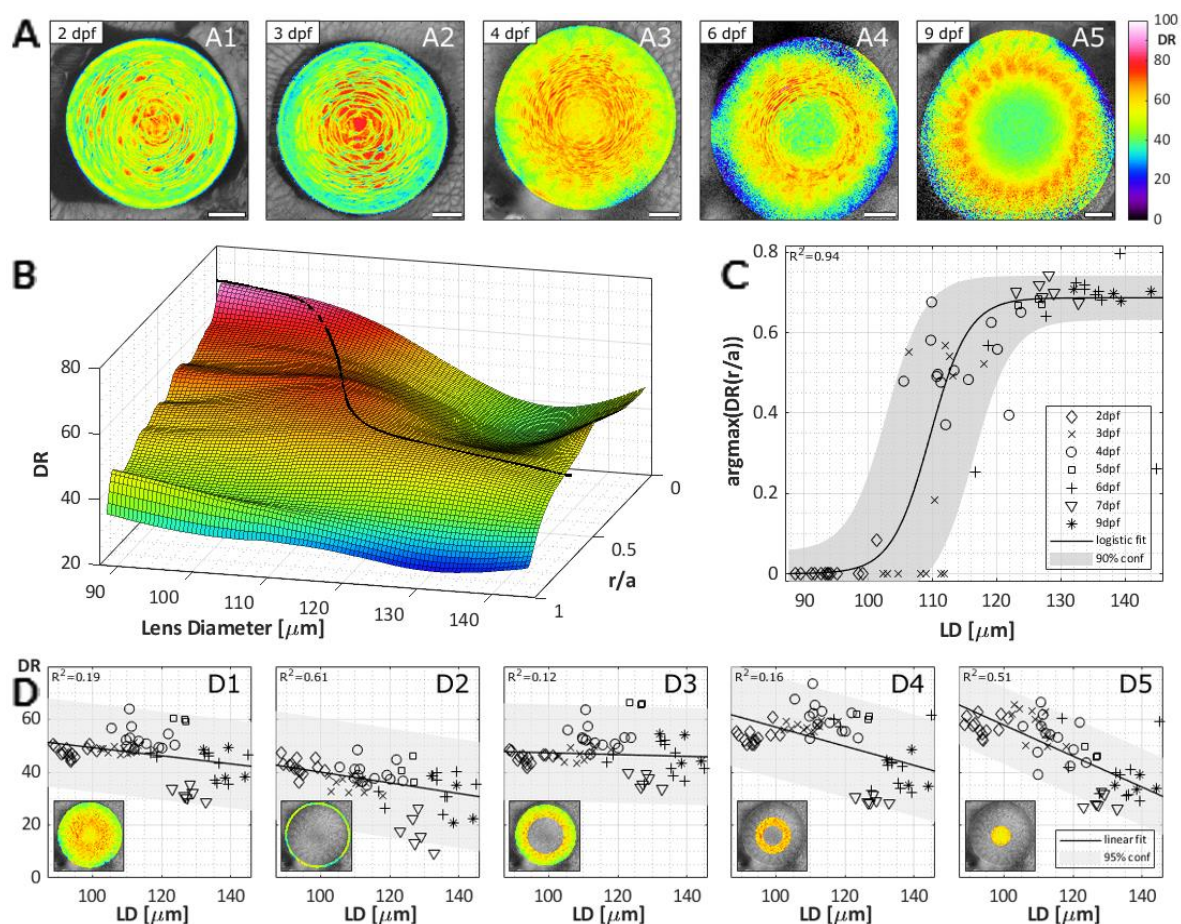

**Figure 3: Distribution of dipolar relaxation in equatorial planes of zebrafish lenses during development.** (A) Examples of dipolar relaxation (DR) images of lenses at specified days post fertilization (dpf). Scale bars are  $20\mu\text{m}$ . (B) Smoothed surface of the mean DR radial profile ( $r/a$ ) as a function of lens diameter (LD) ( $N=63$ ). (C) Radial lens position of the maximal DR value with development. The data is fit to a sigmoid and in turn represented on the surface in panel B. (D) Mean DR of the whole equatorial lens plane (D1), the epithelium (D2), outer cortex (D3), inner cortex (D4) and nucleus (D5) of the lens as indicated by the insets. See Supplementary Table 2 for a summary of  $n$  numbers. See Supplementary Figure 7 for ACDAN intensity images, spectral phasor plots, and DR images for examples shown in A.

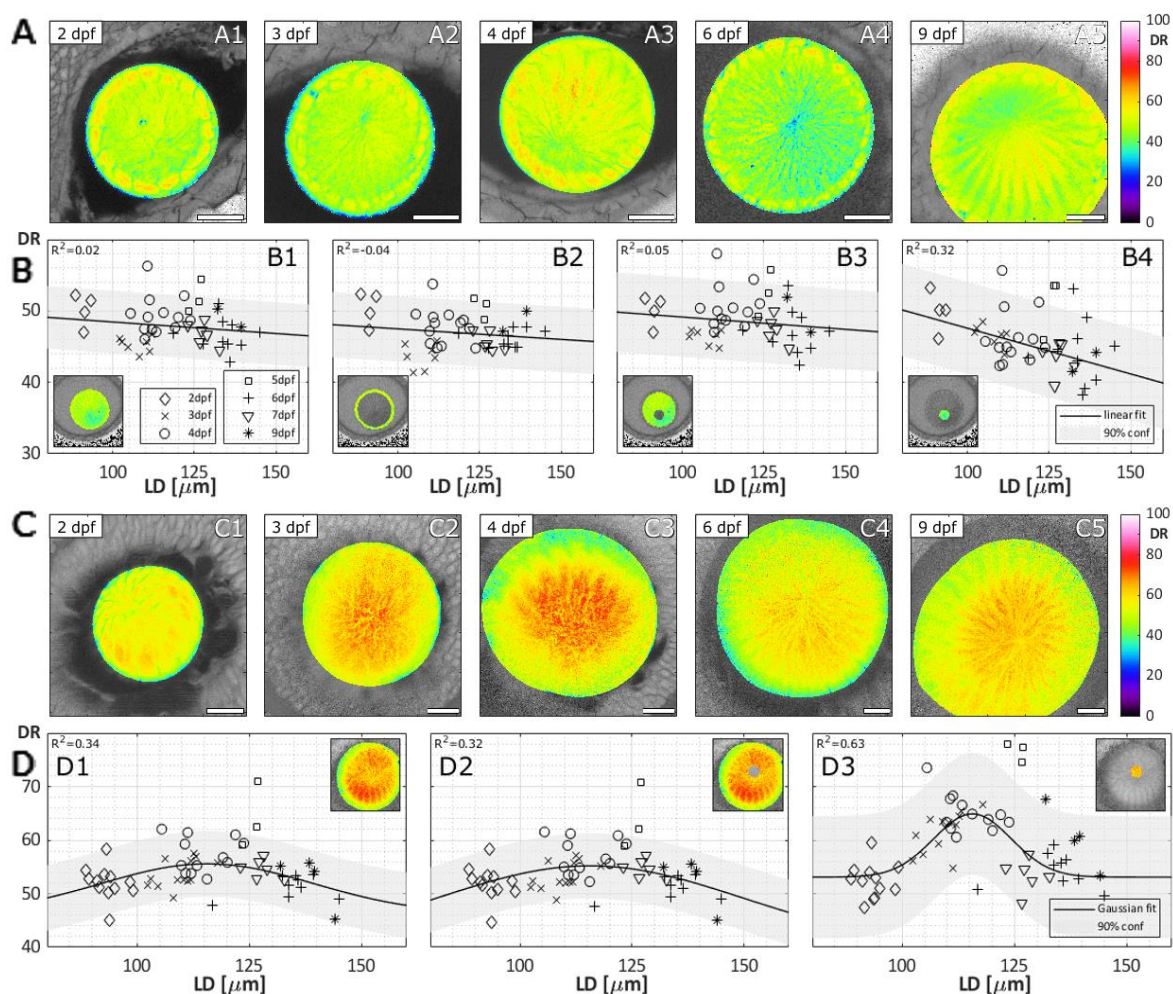

840  
841 **Figure 4: Distribution of dipolar relaxation in anterior and posterior planes of**  
842 **zebrafish lenses during development.**(A) Examples of dipolar relaxation (DR) images of  
843 lenses obtained at the anterior pole at specified days post fertilization (dpf). Scale bars are  
844 20 $\mu\text{m}$ . (B) Mean DR of the whole anterior lens plane (B1), the epithelium (B2), fiber cells  
845 (B3), and sutural region (B4) as indicated by the insets (N=45). (C) Examples of DR  
846 images of lenses obtained at the posterior pole at specified dpf. Scale bars are 20  $\mu\text{m}$ . (D)  
847 Mean DR of the whole posterior lens plane (D1), fiber cells (D2), and sutural region (D3);  
848 N=59). See Supplementary Table 2 for a summary of n numbers.  
849



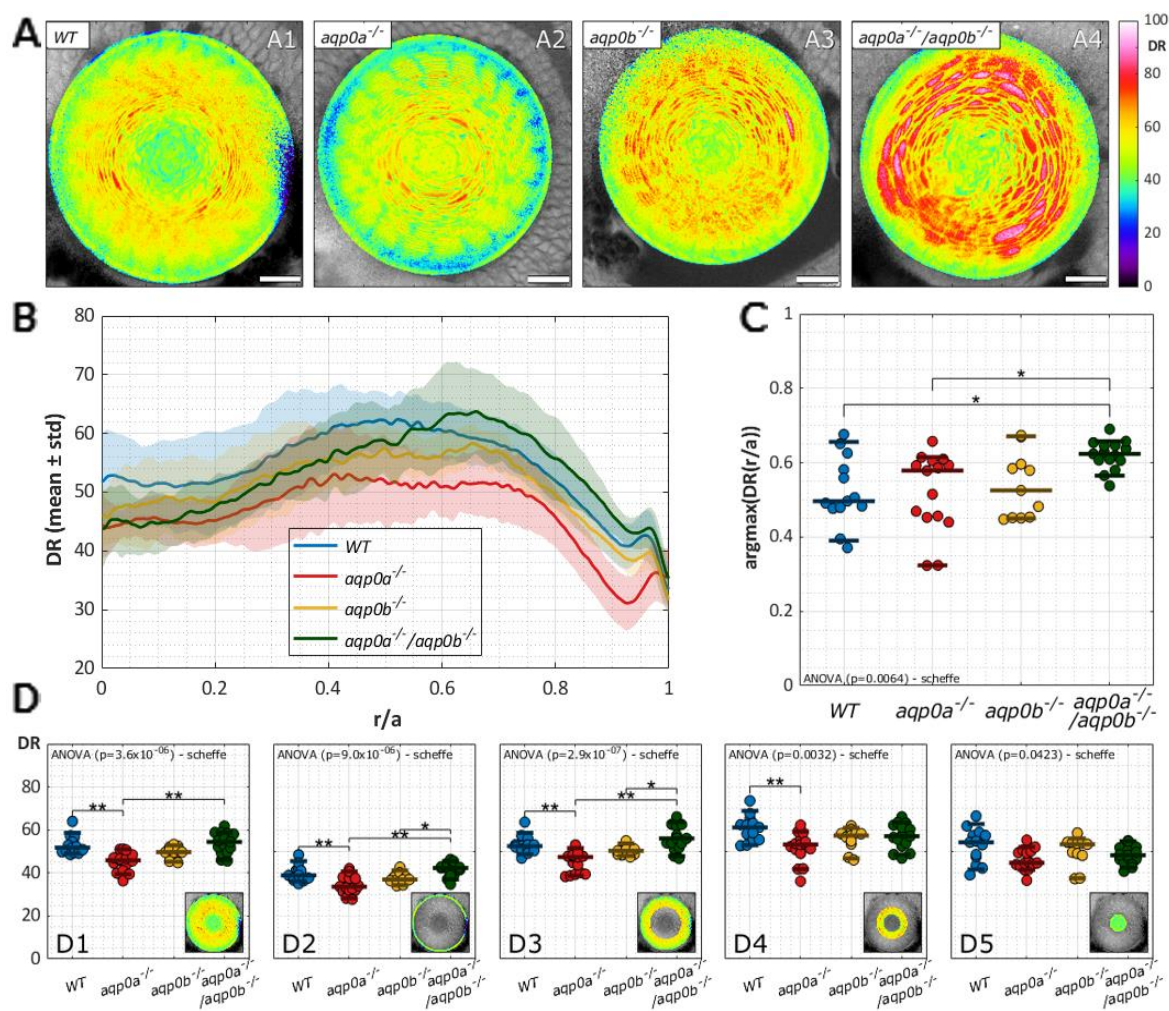

850

851

852

853

854

855

856

**Figure 5: Disruption of dipolar relaxation distribution in Aqp0 mutant lenses.** (A) Examples of dipolar relaxation (DR) images of lenses at 4 dpf of WT and mutants. Scale bars are 20  $\mu$ m. (B) DR radial profiles (N=54). (C) Radial lens position of the maximal DR value in different mutants. (D) Mean DR of the whole equatorial lens plane, epithelium, outer cortex, inner cortex, and core of the lens as indicated by the insets. See Supplementary Table 3 for a summary of n numbers.

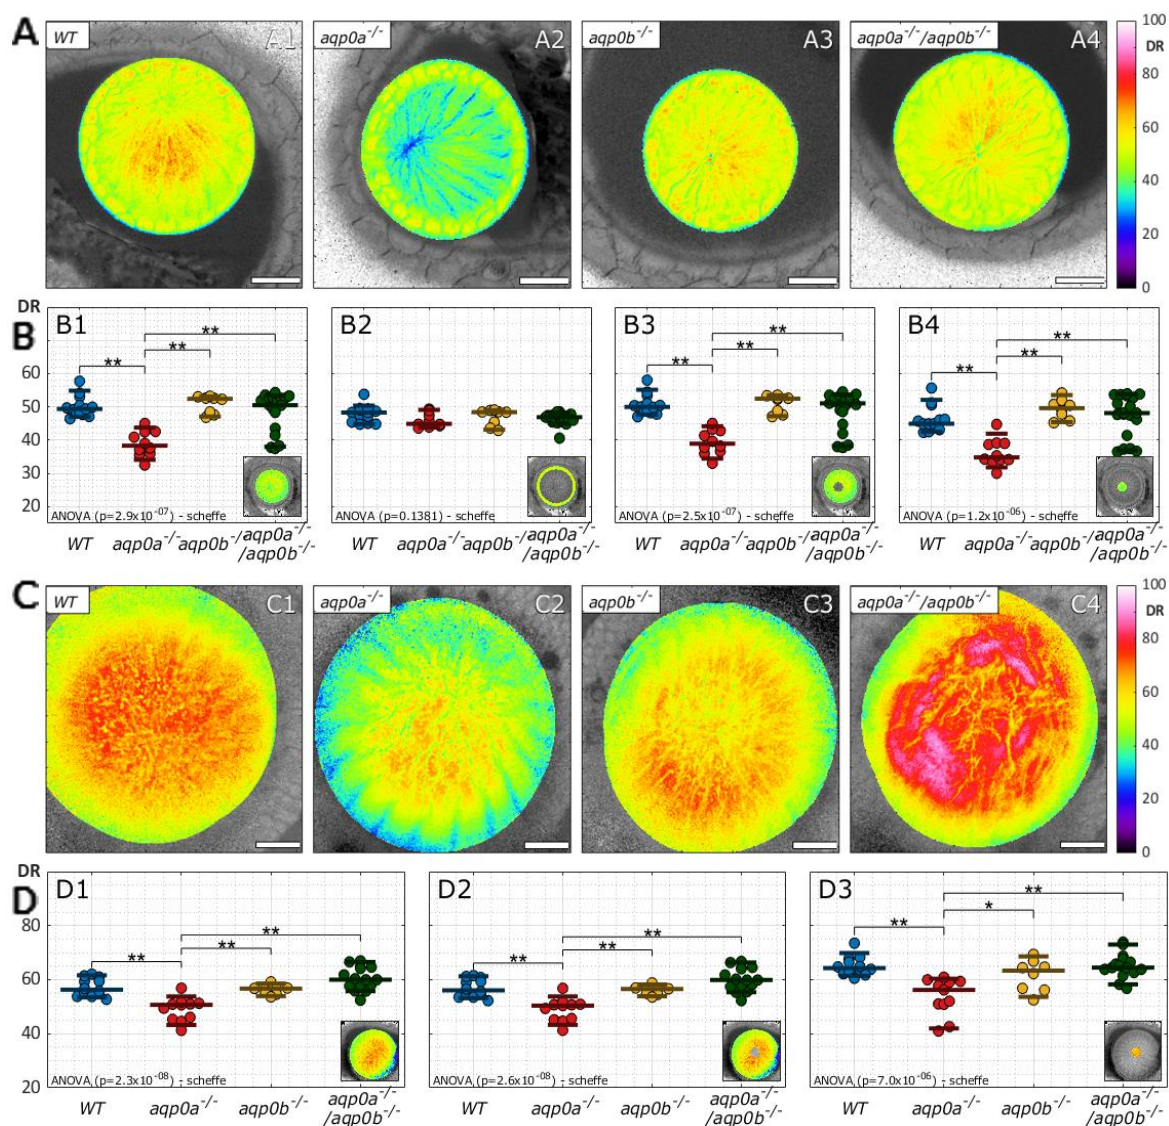

857  
858 **Figure 6: Dipolar relaxation in anterior and posterior planes of Aqp0 mutant lenses.**

859 (A) Examples of dipolar relaxation (DR) images were taken at anterior planes (10  $\mu$ m from  
860 the anterior pole) of lenses at 4 days post-fertilization. Scale bars are 20  $\mu$ m. (B) Mean DR  
861 of the whole anterior lens plane (B1), the epithelium (B2), fiber cells (B3), and sutural  
862 regions (B4) as indicated by the insets (N=50). (C) Examples of DR images taken at  
863 posterior planes of lenses (75-85  $\mu$ m from the anterior pole). Scale bars are 20  $\mu$ m. (D)  
864 Mean DR of the whole posterior pole (D1), fiber cells (D2), and sutural region (D3)  
865 as indicated by the insets (N=46). See Supplementary Table 3 for a summary of n numbers.  
866

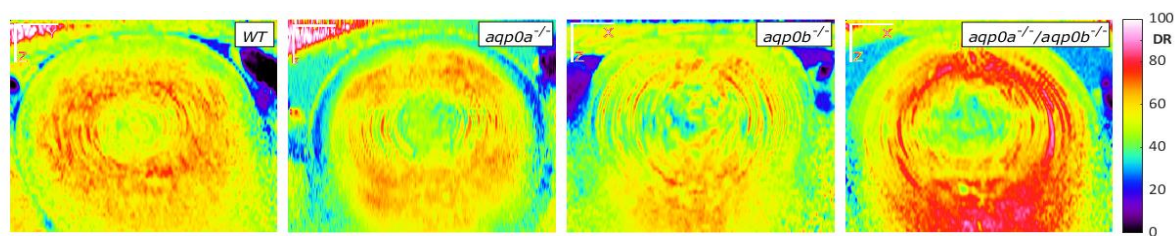

867

868

869

870

871

872

**Figure 7: Axial orientation of DR signal in Aqp0 mutant lenses.** Examples of dipolar relaxation (DR) axial slices through the center of the lens in *WT*, *aqp0a*<sup>-/-</sup>, *aqp0b*<sup>-/-</sup> and *aqp0a*<sup>-/-</sup>/*aqp0b*<sup>-/-</sup> double mutant lenses reconstructed from z-stacks. Anterior is oriented up. Scale bars are 20μm.



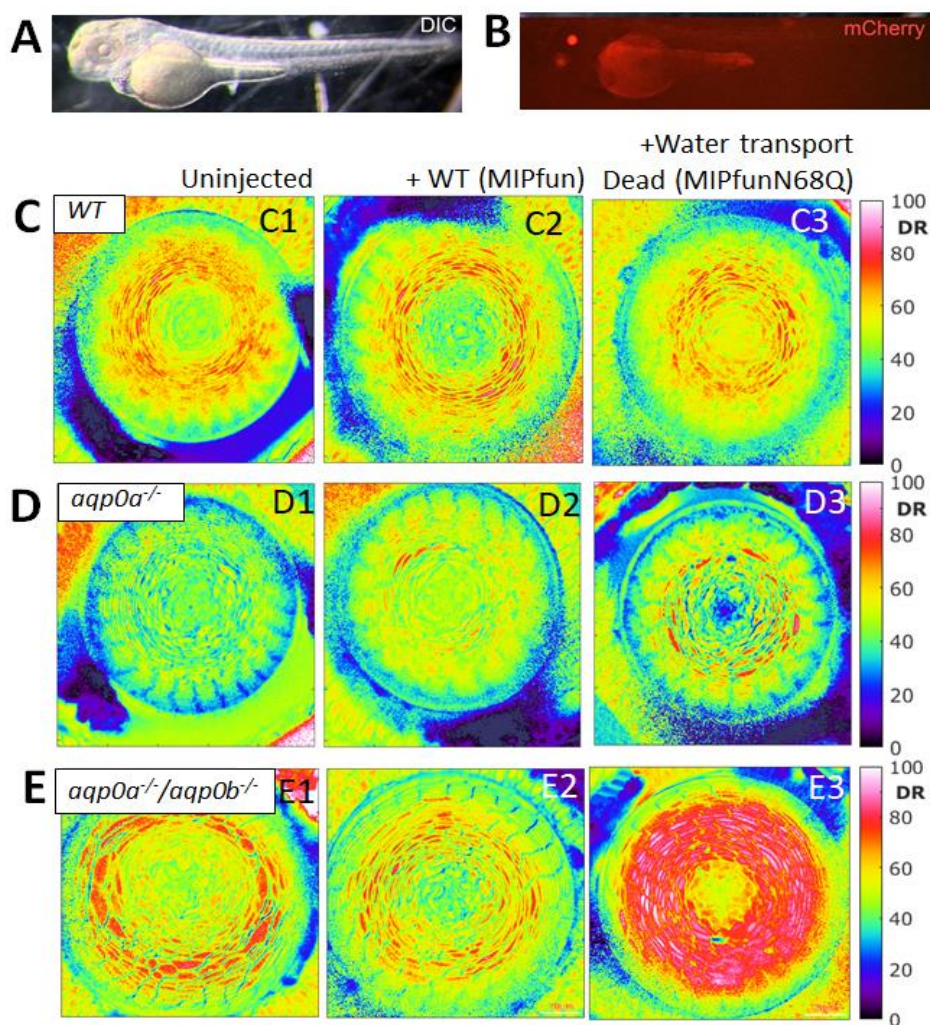

873  
874 **Figure 8: Water channel dead rescue did not restore water homeostasis in the lens.** (A)  
875 Example of zebrafish injected with a rescue construct imaged under DIC illumination and  
876 (B) strong expression of the transgenesis marker, mCherry, in the lens with some  
877 autofluorescence from the yolk. Examples of dipolar relaxation (DR) images of (C) WT,  
878 (D)  $aqp0a^{-/-}$ , and (E)  $aqp0a^{-/-}/aqp0b^{-/-}$  double mutant 4 dpf lenses in equatorial orientation  
879 uninjected and injected with WT MIPfun (*Heteroclitisfundulus* aquaporin 0) rescue  
880 construct *Tg(HuβB1cry:MIPfun-IRES-mCherry)*, and water transport dead construct *and*  
881 *Tg(HuβB1cry:MIPfunN68Q-IRES-mCherry)*. Representative lenses of at least 4 experiments  
882 are shown.  
883

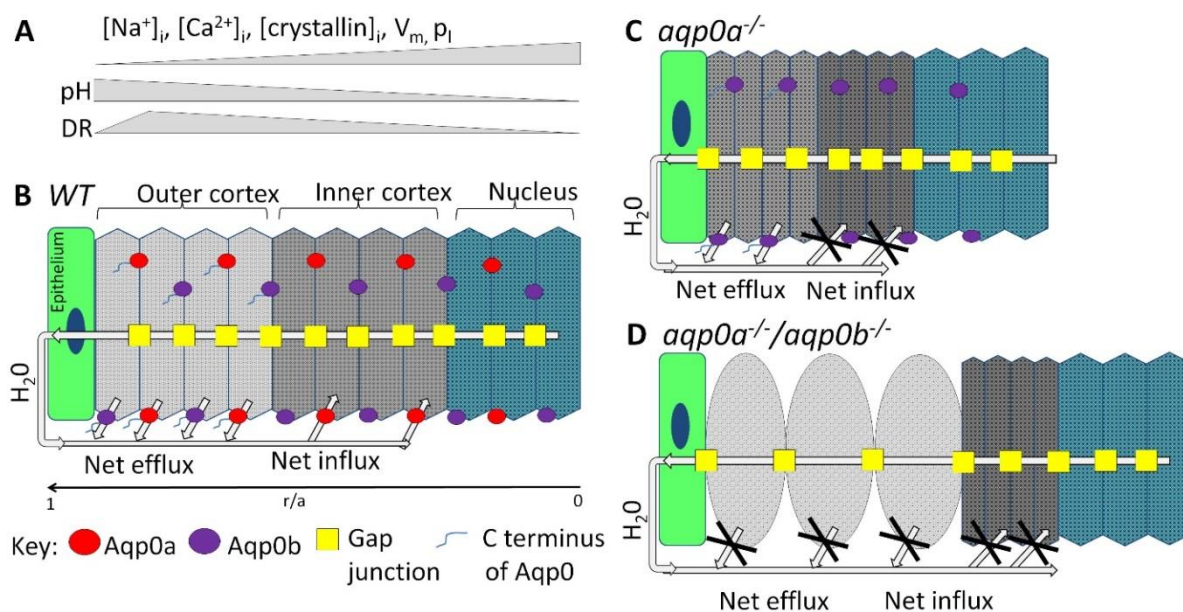

884 **Figure 9: Model of the role of Aqp0a and Aqp0b in lens water transport *in vivo*.**(A)

885 Summary of physiological changes: intracellular Na<sup>+</sup> ( $[Na^+]_i$ ), Ca<sup>2+</sup> ( $[Ca^{2+}]_i$ ), crystallin

886 concentrations ( $[crystallin]_i$ ), plasma membrane voltage potential ( $V_m$ ), lens hydrostatic

887 pressure ( $p_i$ ) and intracellular pH are shown as relative changes by grey bars, that occur

888 from the outer cortex to the nucleus in a mature lens correlating to lens regions in (B). These

889 changes determine its regional macromolecular crowding and thus dipolar relaxation (DR).

890 DR peaks in the outer cortex in mature lenses, and decreases in the lens nucleus indicating

891 lowest macromolecular crowding and highest water activity is in the outer lens cortex, and

892 lowest water activity is in the highly crowded lens nucleus. (B) Diagram of a mature

893 equatorial lens fiber cell stack from epithelium ( $r/a=1$ ), to the center of the lens nucleus

894 ( $r/a=0$ ) with direction of H<sub>2</sub>O flow shown based on previously published work. Aqp0a (red)

895 and Aqp0b (purple) localize to both, broad and narrow fiber cells. Analysis of DR in *aqp0a*<sup>-/-</sup>

896 (C) and *aqp0a*<sup>-/-</sup>/*aqp0b*<sup>-/-</sup> (D) lenses shows that both, Aqp0a and Aqp0b facilitate osmotic

897 water efflux in the outer cortex, while only Aqp0a facilitates water influx into fiber cells in

898 the inner cortex (B). (C) Loss of Aqp0a results in a net loss of water influx, but Aqp0b is

899 still able to facilitate efflux, resulting in net loss of water leading to increased

900 macromolecular crowding and lower DR in the outer and inner cortex. (D) In double *aqp0a*<sup>-/-</sup>

901 */aqp0b*<sup>-/-</sup> mutants, both the H<sub>2</sub>O influx and efflux pathways are disrupted. This water loss

902 results in a more crowded environment in the inner cortex, and lower crowding in the

903 swollen cells of the outer cortex.

904
